# Supplementary material for: Positive effects of a halloysite-supported Cu/Co catalyst fabricated by a urea-driven deposition precipitation method on the CO-SCR reaction and SO2poisoning
Source: Royal Society of Chemistry journal article supplement (doi:10.1039/d0cy02261f), 2021-01-01
Supplement: d0cy02261f1.pdf [file d0cy02261f1.pdf]

## Supporting Information

### **Positive effects of a halloysite-supported Cu/Co catalyst fabricated by a urea-driven deposition precipitation method on the CO-SCR reaction and SO<sub>2</sub> poisoning**

Wei-Jing Li<sup>a</sup>, Shu Tsai<sup>a</sup>, Ming-Yen Wey<sup>a,\*</sup>

*<sup>a</sup> Department of Environmental Engineering, National Chung Hsing University,  
Taichung, 402, Taiwan, ROC*

\*Corresponding author. Tel: +886 4 22840441, Fax: +886 4 22862587, E-mail:  
[mywey@dragon.nchu.edu.tw](mailto:mywey@dragon.nchu.edu.tw)

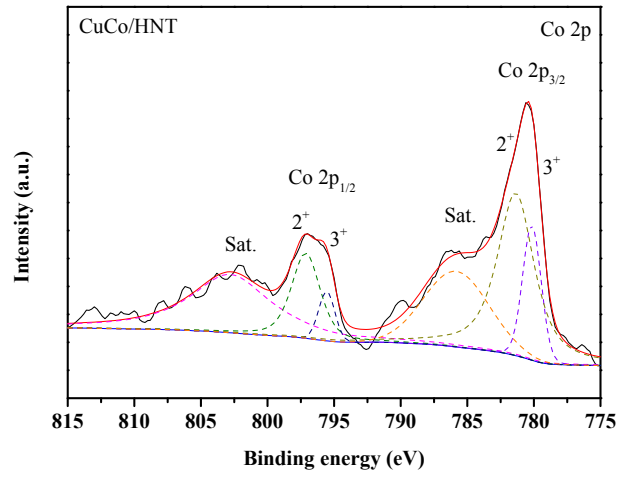

Figure S1. XPS spectra of Co 2p of CoCu/HNT.

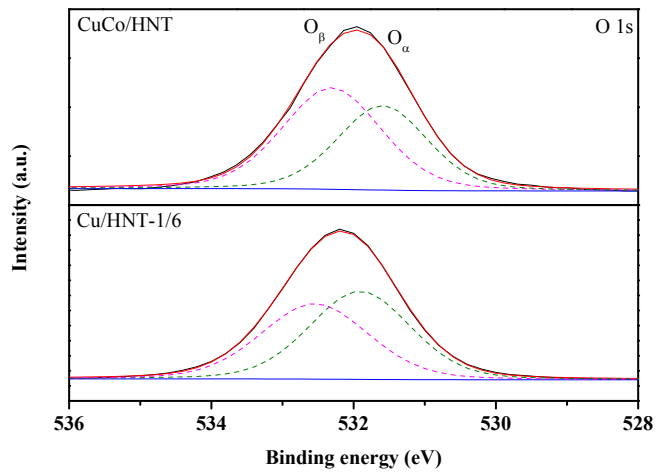

Figure S2. XPS spectra of O 1s of Cu/HNT-1/6 and CuCo/HNT.
